# Supplementary material for: Immunoregulation of macrophages by dynamic ligand presentation via ligand–cation coordination
Source: PubMed Central journal article supplement (PMC6461616; doi:10.1038/s41467-019-09733-6), 2019-04-12
Supplement: 41467_2019_9733_MOESM2_ESM.pdf [file 41467_2019_9733_MOESM2_ESM.pdf]

### **Description of Additional Supplementary Files**

File Name: Supplementary Movie 1

Description: The real-time fluorescent monitoring of macrophage detachment. The Mg<sup>2+</sup>-BP nanoparticles in the dimers dissolve and disassemble under gentle mixing of EDTA, which mediate macrophage detachment. The movie plays for 10 s, which corresponds to approximately 10 min in real-time.
